# Supplementary material
Source: MDPI journal article supplement (https://www.mdpi.com/2079-6412/12/6/728)
Supplement: s1 [file s1]

# Synthesis and Application of a Low Dye Absorption Water-borne Polyurethane for Microfiber Synthetic Leather

Wenyu Cai, Wei Xin, Haonan Zhang and Yunjun Luo \*

School of Materials Science and Engineering, Beijing Institute of Technology, Beijing 100081, China; cwy9051@163.com (W.C.); xinwii@126.com (W.X.); 18701120979@163.com (H.Z.)

\* Correspondence: yjluo@bit.edu.cn

## 1. SEM Results of Microfiber Leather After Alkali Reduction

SEM images of microfiber synthetic leather with different HTPB contents are shown in Figure 1.

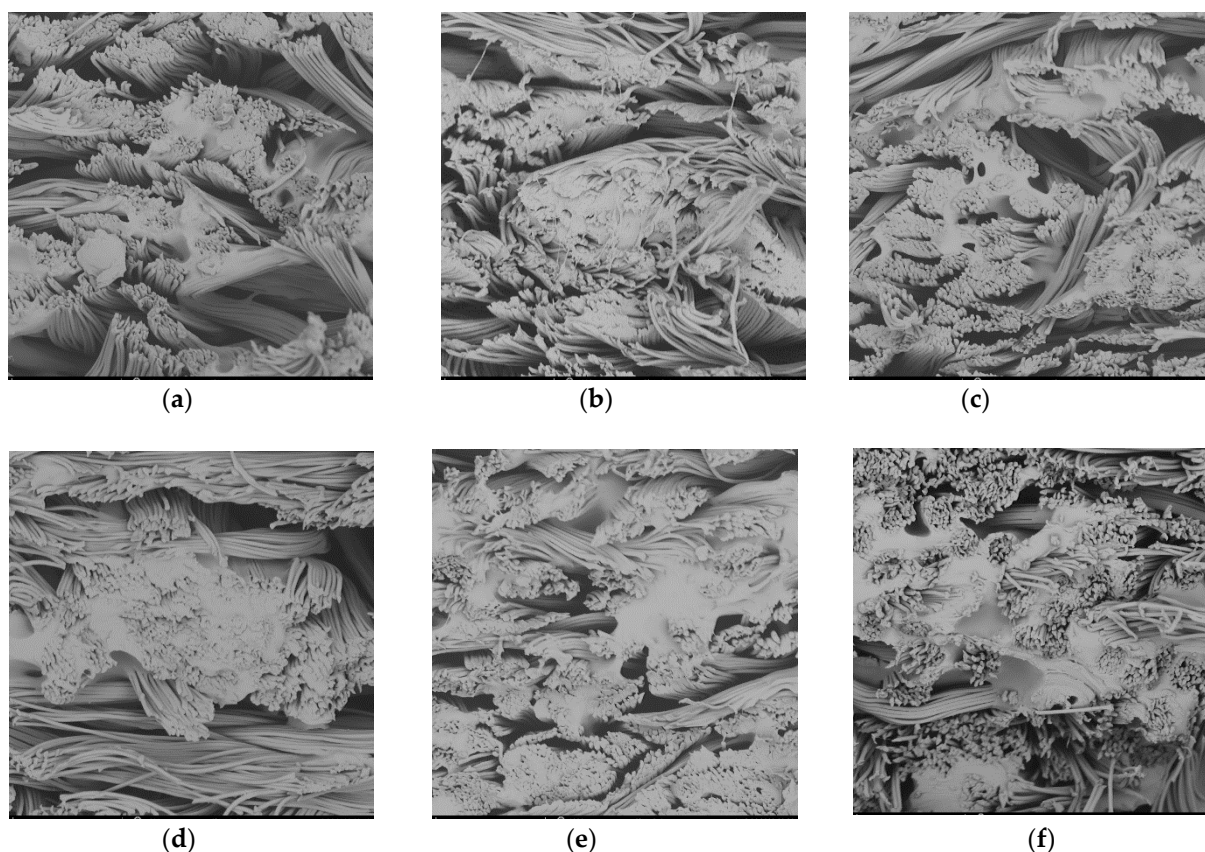

**Figure S1.** SEM images for microfiber synthetic leather: (a) 0% HTPB content; (b) 10% HTPB content; (c) 20% HTPB content; (d) 30% HTPB content; (e) 40% HTPB content; (f) 50% HTPB content.

Comparing the results shows that with the increase in HTPB content, the WPU composition decreased after the alkali reduction process, and the impregnated WPU with 40% HTPB coated more WPU on the surface of the superfine fiber than the impregnated WPU without HTPB added. However, when the addition amount of HTPB increased to 50%, the alkali reduction ratio exhibited an increasing trend, which was consistent with the previous data. The reason is that with the increase in HTPB content, the cross-linking's progress between the double bonds was promoted, the overall degree of cross-linking and

the density of cross-linking were improved, and the infiltration of the corrosive ions was hindered.

## 2. Standard Curve for S-5BL

S-5BL dispersing red with different concentrations of 0, 50, 150, 200, 250 and 300 mg/L were configured with the concentration difference dilution method and the UV absorbance results are shown in Table 1, the S-5BL dispersive dye standard curve is shown in Figure 2.

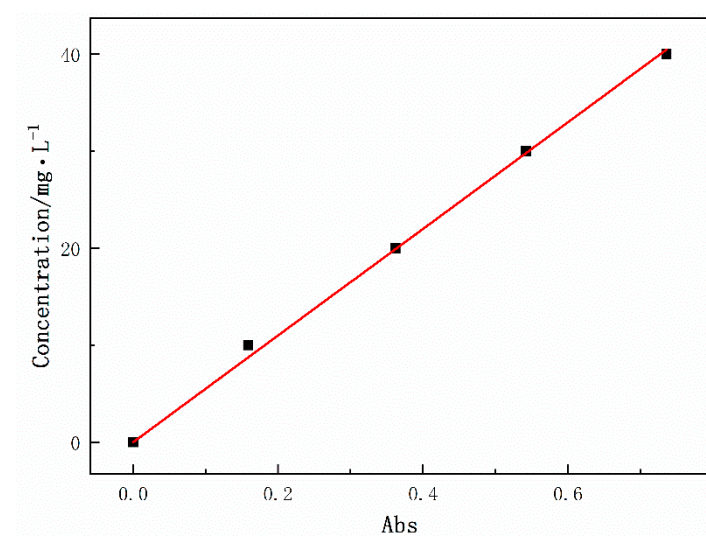

**Figure S2.** Standard curve of disperse dye S-5BL.

**Table S1.** UV absorbance of standard solutions with different S-5BL dispersed red content.

| Concentration (mg/L) | 0 | 50    | 100   | 150   | 200   |
|----------------------|---|-------|-------|-------|-------|
| Absorbance (A)       | 0 | 0.159 | 0.362 | 0.542 | 0.736 |

The regression parameters related to the standard curve of S-5BL dispersed dye are shown in Table 2. After adjustment, the regression coefficient  $R^2=0.97665$ . At the level of 0.05, the slope is significantly different from 0. The independent variable has a significant predictive effect on the dependent variable

**Table S2.** Regression equation parameters of S-5BL disperse dye.

| Equation        | Y-intercept | Slope                  | Pearson's R | $R^2$   | $R^2$ after Adjustment |
|-----------------|-------------|------------------------|-------------|---------|------------------------|
| $Y = a * x + b$ | 0           | $54.98267 \pm 0.68375$ | 0.99969     | 0.99938 | 0.99923                |

## 3. Statistical Analyses for Alkali Reduction Ratio

The microfiber leather prepared from the same modified water-based polyurethane was prepared three times, and the statistics of the alkali reduction rate data were carried out. The results are shown in Table 3. The between-group T-test was carried out for the three parallel data within the group. It can be seen from the T-test results that the one-tail p values between the groups are all less than 0.05, can be considered that the difference between adjacent groups is significant, and the data trend is statistically significant

**Table S3.** Regression equation parameters of S-5BL disperse dye.

| Sample                 | M1WPU-0-a | M1WPU-1-a | M1WPU-2-a | M1WPU-3-a | M1WPU-4-a | M1WPU-5-a |
|------------------------|-----------|-----------|-----------|-----------|-----------|-----------|
| Weight of Nonwovens /g | 16.00     | 16.00     | 16.00     | 16.00     | 16.00     | 16.00     |
| Wet weight /g          | 32.74     | 32.68     | 31.46     | 32.08     | 32.06     | 31.88     |
| Dry weight /g          | 20.98     | 20.75     | 21.04     | 21.03     | 20.89     | 20.68     |

|                                  |       |       |       |       |       |       |
|----------------------------------|-------|-------|-------|-------|-------|-------|
| Gain ratio /%                    | 31.10 | 29.66 | 31.50 | 31.43 | 30.54 | 29.25 |
| Weight after alkali reduction /g | 15.59 | 15.45 | 15.76 | 15.84 | 15.76 | 15.36 |
| Alkali reduction ratio /%        | 33.67 | 33.12 | 32.99 | 32.45 | 32.01 | 33.27 |

| Sample                           | M1WPU-0-b | M1WPU-1-b | M1WPU-2-b | M1WPU-3-b | M1WPU-4-b | M1WPU-5-b |
|----------------------------------|-----------|-----------|-----------|-----------|-----------|-----------|
| Weight of Nonwovens /g           | 16.00     | 16.00     | 16.00     | 16.00     | 16.00     | 16.00     |
| Wet weight /g                    | 32.51     | 32.46     | 31.96     | 31.88     | 32.35     | 32.43     |
| Dry weight /g                    | 20.82     | 20.79     | 20.80     | 20.77     | 20.78     | 20.81     |
| Gain ratio /%                    | 30.13     | 29.94     | 30.00     | 29.81     | 29.88     | 30.06     |
| Weight after alkali reduction /g | 13.79     | 13.86     | 13.95     | 14.07     | 14.17     | 13.75     |
| Alkali reduction ratio /%        | 33.78     | 33.33     | 32.95     | 32.28     | 31.80     | 33.92     |

| Sample                           | M1WPU-0-c | M1WPU-1-c | M1WPU-2-c | M1WPU-3-c | M1WPU-4-c | M1WPU-5-c |
|----------------------------------|-----------|-----------|-----------|-----------|-----------|-----------|
| Weight of Nonwovens /g           | 16.00     | 16.00     | 16.00     | 16.00     | 16.00     | 16.00     |
| Wet weight /g                    | 31.78     | 32.04     | 31.79     | 31.94     | 32.05     | 32.07     |
| Dry weight /g                    | 20.74     | 20.79     | 20.69     | 20.81     | 20.78     | 20.77     |
| Gain ratio /%                    | 29.62     | 29.94     | 29.31     | 30.06     | 29.88     | 29.81     |
| Weight after alkali reduction /g | 13.65     | 13.83     | 13.83     | 14.01     | 14.09     | 13.64     |
| Alkali reduction ratio /%        | 34.19     | 33.49     | 33.18     | 32.68     | 32.20     | 34.31     |

| Sample                        | M1WPU-0 | M1WPU-1 | M1WPU-2 | M1WPU-3 | M1WPU-4 | M1WPU-5 |
|-------------------------------|---------|---------|---------|---------|---------|---------|
| Alkali reduction ratio (a) /% | 33.67   | 33.12   | 32.99   | 32.45   | 32.01   | 33.27   |
| Alkali reduction ratio (b) /% | 33.78   | 33.33   | 32.95   | 32.28   | 31.80   | 33.92   |
| Alkali reduction ratio (c) /% | 34.19   | 33.49   | 33.18   | 32.68   | 32.20   | 34.31   |

a, b and c means three leather samples for same WPU

**Table S4.** T-test results for alkali reduction.

| Sample              | M1WPU-0  | M1WPU-1  |
|---------------------|----------|----------|
| Mean                | 33.88    | 33.31333 |
| Variance            | 0.0751   | 0.034433 |
| Observations        | 3        | 3        |
| pooled variance     | 0.054767 |          |
| df                  | 4        |          |
| t Stat              | 2.965618 |          |
| P(T<=t) one-tail    | 0.020662 |          |
| t Critical one-tail | 2.131847 |          |
| Sample              | M1WPU-2  | M1WPU-3  |
| Mean                | 33.04    | 32.47    |
| Variance            | 0.0151   | 0.0403   |
| Observations        | 3        | 3        |
| pooled variance     | 0.0277   |          |
| df                  | 4        |          |
| t Stat              | 4.194504 |          |
| P(T<=t) one-tail    | 0.006878 |          |
| t Critical one-tail | 2.131847 |          |

| Sample              | M1WPU-1  | M1WPU-2  |
|---------------------|----------|----------|
| Mean                | 33.31333 | 33.04    |
| Variance            | 0.034433 | 0.0151   |
| Observations        | 3        | 3        |
| pooled variance     | 0.024767 |          |
| df                  | 4        |          |
| t Stat              | 2.127181 |          |
| P(T<=t) one-tail    | 0.050263 |          |
| t Critical one-tail | 2.131847 |          |
| Sample              | M1WPU-3  | M1WPU-4  |
| Mean                | 32.47    | 32.00333 |
| Variance            | 0.0403   | 0.040033 |
| Observations        | 3        | 3        |
| pooled variance     | 0.040167 |          |
| df                  | 4        |          |
| t Stat              | 2.851803 |          |
| P(T<=t) one-tail    | 0.023156 |          |
| t Critical one-tail | 2.131847 |          |

---

| Sample              | M1WPU-4  | M1WPU-5  |
|---------------------|----------|----------|
| Mean                | 32.00333 | 33.83333 |
| Variance            | 0.040033 | 0.276033 |
| Observations        | 3        | 3        |
| pooled variance     | 0.158033 |          |
| df                  | 4        |          |
| t Stat              | -5.63796 |          |
| P(T<=t) one-tail    | 0.002436 |          |
| t Critical one-tail | 2.131847 |          |

---
